# Supplementary material for: Cd4InO(BO3)3: A New Nonlinear Optical Crystal Exhibiting Strong Second Harmonic Generation Effect and Moderate Birefringence
Source: MDPI journal article supplement (doi:10.3390/cryst12020266), 2022-02-15
Supplement: s1 [file s1]

# **Cd<sub>4</sub>InO(BO<sub>3</sub>)<sub>3</sub>: A New Nonlinear Optical Crystal Exhibiting Strong Second Harmonic Generation Effect and Moderate Birefringence**

Runqing Liu,<sup>1,2</sup> Hongping Wu,<sup>1</sup> Hongwei Yu,<sup>\*1</sup> Zhanggui Hu,<sup>1</sup> Jiyang Wang,<sup>1</sup> Yicheng Wu<sup>1</sup>

*1. Tianjin Key Laboratory of Functional Crystal Materials, Institute of Functional Crystals, College of Materials Science and Engineering, Tianjin University of Technology, Tianjin 300384, China*

*2. College of Material and Chemical Engineering, Tongren University, Tongren 554300, China.*

*E-mail: hwyu15@gmail.com; Fax: (86)22-60215555; Tel: (86)22-60216058*

## ***Content***

|                                                                                                                                                                         |    |
|-------------------------------------------------------------------------------------------------------------------------------------------------------------------------|----|
| <b><i>Table S1.</i></b> Crystal data and structure refinement for $\text{Cd}_4\text{InO}(\text{BO}_3)_3$ .....                                                          | 1  |
| <b><i>Table S2.</i></b> Atomic coordinates and equivalent isotropic atomic displacement parameters ( $\text{\AA}^2$ ) for $\text{Cd}_4\text{InO}(\text{BO}_3)_3$ . .... | 2  |
| <b><i>Table S3.</i></b> Bond lengths ( $\text{\AA}$ ) for $\text{Cd}_4\text{InO}(\text{BO}_3)_3$ .....                                                                  | 3  |
| <b><i>Table S4.</i></b> Bond angles ( $^\circ$ ) for $\text{Cd}_4\text{InO}(\text{BO}_3)_3$ .....                                                                       | 4  |
| <b><i>Table S5.</i></b> Dipole moments of $\text{BO}_3$ and $\text{CdO}_n$ ( $n=6,8$ ) polyhedra in the unit cell.....                                                  | 6  |
| <b><i>Figure S1.</i></b> UV-Vis-NIR diffuse reflectance spectroscopy of $\text{Cd}_4\text{InO}(\text{BO}_3)_3$ .....                                                    | 7  |
| <b><i>Figure S2.</i></b> IR Spectroscopy of $\text{Cd}_4\text{InO}(\text{BO}_3)_3$ .....                                                                                | 8  |
| <b><i>Table S6.</i></b> The assignments of the Infrared absorption peaks for CIBO.....                                                                                  | 9  |
| <b><i>Table S7.</i></b> Table of the PXRD for CIBO.....                                                                                                                 | 10 |
| <b><i>Figure S3.</i></b> Crystal for the birefringence determination.....                                                                                               | 11 |

**Table S1.** Crystal data and structure refinement for Cd<sub>4</sub>InO(BO<sub>3</sub>)<sub>3</sub>.

| Chemical formula                                    | Cd <sub>4</sub> InO(BO <sub>3</sub> ) <sub>3</sub>        |
|-----------------------------------------------------|-----------------------------------------------------------|
| Formula weight                                      | 756.85 g/mol                                              |
| Temperature                                         | 298(2) K                                                  |
| Wavelength                                          | 0.71073 Å                                                 |
| Crystal system                                      | monoclinic                                                |
| Space group                                         | <i>Cm</i>                                                 |
| Unit cell dimensions ( Å)                           | a = 7.880(2)<br>b = 15.729(4)<br>c = 3.3994(8)            |
| $\beta$ (°)                                         | 99.871 (10)                                               |
| Volume, Z                                           | 415.10(18) Å <sup>3</sup> , 2                             |
| Density (calculated)                                | 6.055 g/cm <sup>3</sup>                                   |
| Theta range for data collection                     | 2.59 to 24.91°                                            |
| Index ranges                                        | -9<= <i>h</i> <=9, -18<= <i>k</i> <=18, -4<= <i>l</i> <=3 |
| Coverage of independent reflections                 | 99 %                                                      |
| Reflections collected                               | 1986                                                      |
| Independent reflections ( <i>R</i> <sub>int</sub> ) | 0.0374                                                    |
| Refinement method                                   | Full-matrix least-squares on F <sup>2</sup>               |
| Goodness-of-fit on F <sup>2</sup>                   | 1.043                                                     |
| Final R indices I>2σ(I)                             | R <sub>1</sub> =0.0200, wR <sub>2</sub> =0.0462           |
| all data                                            | R <sub>1</sub> =0.0201, wR <sub>2</sub> =0.0462           |
| Largest diff. peak and hole                         | 0.667 and -0.639 eÅ <sup>-3</sup>                         |

<sup>[a]</sup>  $R_1 = \Sigma ||F_o| - |F_c|| / \Sigma |F_o|$  and  $wR_2 = [\Sigma w(F_o^2 - F_c^2)^2 / \Sigma w F_o^4]^{1/2}$  for  $F_o^2 > 2\sigma(F_o^2)$ .

**Table S2.** Atomic coordinates and equivalent isotropic atomic displacement parameters ( $\text{\AA}^2$ ) for  $\text{Cd}_4\text{InO}(\text{BO}_3)_3$ .

| Atoms | x/a         | y/b        | z/c         | U(eq)      | BVS   |
|-------|-------------|------------|-------------|------------|-------|
| In1   | 0.86175(15) | 0.5        | 0.1551(3)   | 0.0127(3)  | 3.031 |
| Cd1   | 0.50451(11) | 0.38768(5) | 0.48776(19) | 0.0121(3)  | 2.230 |
| Cd2   | 0.11470(13) | 0.32300(6) | 0.7890(2)   | 0.0183(3)  | 1.917 |
| O1    | 0.0602(18)  | 0.5        | 0.752(4)    | 0.021(3)   | 2.003 |
| O2    | 0.6779(17)  | 0.5        | 0.575(4)    | 0.017(3)   | 1.871 |
| O3    | 0.3273(13)  | 0.2721(6)  | 0.437(3)    | 0.025(2)   | 1.922 |
| O4    | 0.3221(11)  | 0.4242(5)  | 0.919(3)    | 0.0168(19) | 2.145 |
| O5    | 0.6364(13)  | 0.3205(5)  | 0.034(3)    | 0.0180(19) | 2.041 |
| O6    | 0.9353(11)  | 0.3595(5)  | 0.223(3)    | 0.0148(18) | 2.045 |
| B1    | 0.234(3)    | 0.5        | 0.867(6)    | 0.012(4)   | 2.920 |
| B2    | 0.8027(18)  | 0.3012(9)  | 0.226(4)    | 0.012(3)   | 3.124 |

Symmetry transformations used to generate equivalent atoms:

#1 x,y,z+1 #2 x,y,z-1 #3 x-1/2,y-1/2,z #4 x-1/2,y-1/2,z+1 #5 x+1/2,-y+1/2,z #6 x+1/2,-y+1/2,z+1 #7 x+1/2,y+1/2,z-1 #8 x+1/2,y+1/2,z #9 x,-y+1,z #10 x-1/2,y+1/2,z #11 x-1/2,-y+1/2,z #12 x-1/2,-y+1/2,z-1 #13 x+1/2,y-1/2,z.

**Table S3.** Bond lengths (Å) for Cd<sub>4</sub>InO(BO<sub>3</sub>)<sub>3</sub>.

| bonds  | lengths   | bonds  | lengths   |
|--------|-----------|--------|-----------|
| In1-O5 | 2.110(2)  | In1-O5 | 2.110(3)  |
| In1-O1 | 2.140(2)  | In1-O3 | 2.226(14) |
| In1-O3 | 2.226(14) | In1-O1 | 2.140(2)  |
| Cd1-O5 | 2.200(15) | Cd1-O6 | 2.208(15) |
| Cd1-O2 | 2.265(13) | Cd1-O4 | 2.279(14) |
| Cd1-O6 | 2.280(14) | Cd1-O4 | 2.296(13) |
| Cd2-O3 | 2.238(14) | Cd2-O3 | 2.294(13) |
| Cd2-O4 | 2.294(14) | Cd2-O2 | 2.366(14) |
| Cd2-O6 | 2.431(14) | Cd2-O2 | 2.366(14) |
| Cd2-O2 | 2.366(14) | Cd2-O3 | 2.801(3)  |
| O2-B1  | 1.440(3)  | O1-B2  | 1.390(4)  |
| O4-B2  | 1.340(2)  | O3-B1  | 1.340(3)  |
| O4-B2  | 1.340(2)  | O6-B1  | 1.370(3)  |

**Table S4.** Bond angles (°) for Cd<sub>4</sub>InO(BO<sub>3</sub>)<sub>3</sub>.

| bonds     | angles    | bonds     | angles    |
|-----------|-----------|-----------|-----------|
| O5-In1-O1 | 81.2(8)   | O5-In1-O1 | 178.7(8)  |
| O1-In1-O1 | 94.9(7)   | O3-In1-O1 | 77.6(4)   |
| O3-In1-O1 | 77.6(4)   | O5-Cd1-O6 | 94.6(7)   |
| O5-Cd1-O2 | 176.2(8)  | O6-Cd1-O2 | 83.4(6)   |
| O5-Cd1-O4 | 100.5(7)  | O6-Cd1-O4 | 164.8(5)  |
| O2-Cd1-O4 | 81.4(6)   | O5-Cd1-O6 | 97.5(7)   |
| O6-Cd1-O6 | 98.2(6)   | O2-Cd1-O6 | 86.0(5)   |
| O4-Cd1-O6 | 80.5(5)   | O5-Cd1-O4 | 97.4(7)   |
| O6-Cd1-O4 | 81.7(5)   | O2-Cd1-O4 | 79.1(5)   |
| O4-Cd1-O4 | 95.7(5)   | O6-Cd1-O4 | 165.0(5)  |
| O3-Cd2-O4 | 109.0(5)  | O3-Cd2-O3 | 96.9(5)   |
| O3-Cd2-O2 | 92.3(5)   | O3-Cd2-O4 | 103.5(5)  |
| O4-Cd2-O2 | 77.0(5)   | O3-Cd2-O2 | 170.0(5)  |
| O3-Cd2-O6 | 91.2(5)   | O3-Cd2-O6 | 119.8(5)  |
| O2-Cd2-O6 | 80.7(5)   | O4-Cd2-O6 | 126.7(5)  |
| O3-Cd2-O2 | 84.9(5)   | O3-Cd2-O2 | 176.0(5)  |
| O2-Cd2-O2 | 85.7(5)   | O4-Cd2-O2 | 73.9(5)   |
| O3-B1-O6  | 123.6(19) | O6-Cd2-O2 | 56.5(5)   |
| O6-B1-O2  | 117.1(17) | O3-B1-O2  | 119.3(19) |
| O4-B2-O4  | 119.(3)   | O4-B2-O1  | 120.5(15) |
| O4-B2-O1  | 120.5(15) | O5-In1-O1 | 178.7(8)  |
| O5-In1-O1 | 81.2(8)   | O3-In1-O1 | 77.6(4)   |
| O1-In1-O1 | 94.9(7)   | O5-Cd1-O6 | 94.6(7)   |
| O3-In1-O1 | 77.6(4)   | O6-Cd1-O2 | 83.4(6)   |
| O5-Cd1-O2 | 176.2(8)  | O6-Cd1-O4 | 164.8(5)  |
| O5-Cd1-O4 | 100.5(7)  | O5-Cd1-O6 | 97.5(7)   |
| O2-Cd1-O4 | 81.4(6)   | O2-Cd1-O6 | 86.0(5)   |
| O6-Cd1-O6 | 98.2(6)   | O5-Cd1-O4 | 97.4(7)   |
| O4-Cd1-O6 | 80.5(5)   | O2-Cd1-O4 | 79.1(5)   |
| O6-Cd1-O4 | 81.7(5)   | O6-Cd1-O4 | 165.0(5)  |
| O4-Cd1-O4 | 95.7(5)   | O3-Cd2-O3 | 96.9(5)   |
| O3-Cd2-O4 | 109.0(5)  | O3-Cd2-O4 | 103.5(5)  |
| O3-Cd2-O2 | 92.3(5)   | O3-Cd2-O2 | 170.0(5)  |
| O4-Cd2-O2 | 77.0(5)   | O3-Cd2-O6 | 119.8(5)  |
| O3-Cd2-O6 | 91.2(5)   | O4-Cd2-O6 | 126.7(5)  |
| O2-Cd2-O6 | 80.7(5)   | O3-Cd2-O2 | 176.0(5)  |
| O3-Cd2-O2 | 84.9(5)   | O4-Cd2-O2 | 73.9(5)   |
| O2-Cd2-O2 | 85.7(5)   | O6-Cd2-O2 | 56.5(5)   |
| O3-B1-O6  | 123.6(19) | O3-B1-O2  | 119.3(19) |
| O6-B1-O2  | 117.1(17) | O4-B2-O1  | 120.5(15) |

|          |         |          |           |
|----------|---------|----------|-----------|
| O4-B2-O4 | 119.(3) | O4-B2-O1 | 120.5(15) |
|----------|---------|----------|-----------|

**Table S5.** Dipole moments of  $\text{BO}_3$  and  $\text{CdO}_n$  ( $n=6, 8$ ) polyhedra in the unit cell.

| Species                                |                | a-axis (D) | b-axis (D) | c-axis (D) | total (D) |
|----------------------------------------|----------------|------------|------------|------------|-----------|
| $\text{Cd}_4\text{InO}(\text{BO}_3)_3$ | $\text{BO}_3$  | 0          | 1.025      | 0          | 1.025     |
|                                        | $\text{CdO}_n$ | 0          | 0.878      | 0          | 0.878     |
|                                        | ( $n=6,8$ )    |            |            |            |           |



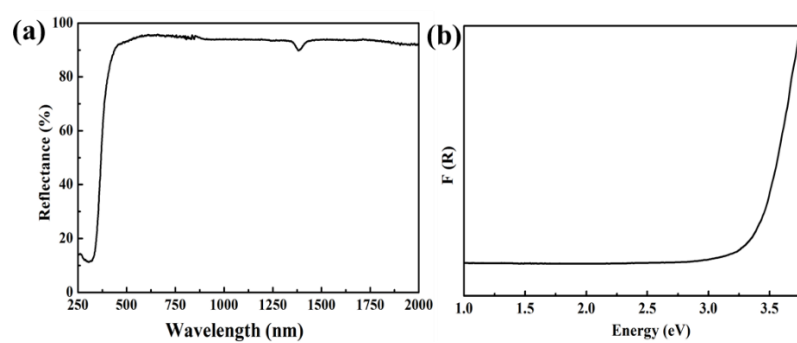

**Figure S1.** The UV-Vis-NIR diffuse reflectance spectroscopy of  $\text{Cd}_4\text{InO}(\text{BO}_3)_3$ .

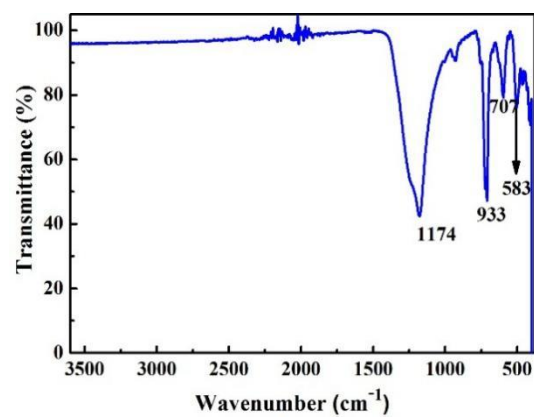

**Figure S2.** The IR spectroscopy of  $\text{Cd}_4\text{InO}(\text{BO}_3)_3$ .

**Table S6.** The assignments of the Infrared absorption peaks for CIBO

| Type of vibration                                  | characteristic absorption peak (cm <sup>-1</sup> ) of CIBO |
|----------------------------------------------------|------------------------------------------------------------|
| B <sub>3</sub> -O asymmetric stretching vibration  | 1174                                                       |
| B <sub>3</sub> -O symmetrical stretching vibration | 933                                                        |
| B <sub>3</sub> -O Out-of-plane bending vibration   | 707                                                        |
| B <sub>3</sub> -O bending vibration                | 583                                                        |

Table S7. The PXRD pattern of CIBO

| 2-Theta | d      | BG  | Height | I %  | Area  | I%   | FWHM  | XS    |
|---------|--------|-----|--------|------|-------|------|-------|-------|
| 12.697  | 6.9659 | 1   | 286    | 2.9  | 2013  | 2.4  | 0.12  | >1000 |
| 20.381  | 4.3539 | 12  | 5233   | 52.5 | 36663 | 42.9 | 0.119 | >1000 |
| 22.538  | 3.9418 | 13  | 1162   | 11.7 | 10027 | 11.7 | 0.147 | 755   |
| 22.879  | 3.8837 | 9   | 2547   | 25.6 | 18659 | 21.8 | 0.125 | >1000 |
| 25.542  | 3.4846 | 7   | 3755   | 37.7 | 26720 | 31.3 | 0.121 | >1000 |
| 26.663  | 3.3405 | 6   | 459    | 4.6  | 3332  | 3.9  | 0.123 | >1000 |
| 27.722  | 3.2153 | 6   | 201    | 2    | 1277  | 1.5  | 0.108 | >1000 |
| 29.017  | 3.0747 | 6   | 1291   | 13   | 9445  | 11.1 | 0.124 | >1000 |
| 30.562  | 2.9227 | 25  | 7679   | 77.1 | 54782 | 64.1 | 0.121 | >1000 |
| 31.441  | 2.8429 | 286 | 7046   | 70.7 | 43172 | 50.5 | 0.104 | >1000 |
| 32.118  | 2.7845 | 40  | 9960   | 100  | 85445 | 100  | 0.146 | 779   |
| 32.322  | 2.7675 | 32  | 4912   | 49.3 | 42584 | 49.8 | 0.147 | 764   |
| 34.1    | 2.6271 | 45  | 2273   | 22.8 | 16496 | 19.3 | 0.123 | >1000 |
| 35.101  | 2.5544 | 17  | 2648   | 26.6 | 32011 | 37.5 | 0.206 | 464   |
| 35.417  | 2.5323 | 9   | 2201   | 22.1 | 17964 | 21   | 0.139 | 867   |
| 38.479  | 2.3376 | 2   | 242    | 2.4  | 2667  | 3.1  | 0.187 | 531   |
| 38.738  | 2.3226 | 3   | 1215   | 12.2 | 9239  | 10.8 | 0.129 | >1000 |
| 39.582  | 2.275  | 54  | 2839   | 28.5 | 18612 | 21.8 | 0.111 | >1000 |
| 40.199  | 2.2415 | 16  | 839    | 8.4  | 6793  | 8    | 0.138 | 894   |
| 40.541  | 2.2233 | 16  | 113    | 1.1  | 790   | 0.9  | 0.119 | >1000 |
| 41.442  | 2.177  | 19  | 703    | 7.1  | 5218  | 6.1  | 0.126 | >1000 |
| 41.702  | 2.1641 | 14  | 572    | 5.7  | 4993  | 5.8  | 0.148 | 775   |
| 42.381  | 2.131  | 8   | 400    | 4    | 2715  | 3.2  | 0.115 | >1000 |
| 43.798  | 2.0653 | 12  | 1568   | 15.7 | 10780 | 12.6 | 0.117 | >1000 |
| 45.041  | 2.0111 | 13  | 1150   | 11.5 | 8547  | 10   | 0.126 | >1000 |
| 45.277  | 2.0012 | 12  | 284    | 2.9  | 4145  | 4.9  | 0.248 | 379   |
| 46      | 1.9714 | 10  | 69     | 0.7  | 382   | 0.4  | 0.094 | >1000 |
| 46.739  | 1.9419 | 13  | 345    | 3.5  | 2119  | 2.5  | 0.104 | >1000 |
| 47.523  | 1.9117 | 19  | 725    | 7.3  | 4687  | 5.5  | 0.11  | >1000 |
| 48.416  | 1.8785 | 23  | 871    | 8.7  | 6388  | 7.5  | 0.125 | >1000 |
| 48.996  | 1.8576 | 25  | 53     | 0.5  | 355   | 0.4  | 0.114 | >1000 |
| 49.802  | 1.8294 | 27  | 2769   | 27.8 | 22821 | 26.7 | 0.14  | 892   |
| 49.979  | 1.8233 | 27  | 1171   | 11.8 | 14890 | 17.4 | 0.216 | 457   |
| 51.279  | 1.7801 | 28  | 2022   | 20.3 | 20862 | 24.4 | 0.175 | 612   |
| 51.979  | 1.7578 | 26  | 1029   | 10.3 | 9207  | 10.8 | 0.152 | 771   |
| 52.323  | 1.7471 | 27  | 1812   | 18.2 | 16734 | 19.6 | 0.157 | 731   |
| 53.563  | 1.7095 | 27  | 1037   | 10.4 | 7626  | 8.9  | 0.125 | >1000 |
| 53.96   | 1.6979 | 33  | 1180   | 11.8 | 10479 | 12.3 | 0.151 | 788   |
| 54.402  | 1.6851 | 26  | 1869   | 18.8 | 13477 | 15.8 | 0.123 | >1000 |
| 55.48   | 1.6549 | 26  | 913    | 9.2  | 5824  | 6.8  | 0.108 | >1000 |
| 56.262  | 1.6337 | 27  | 258    | 2.6  | 1468  | 1.7  | 0.097 | >1000 |

|        |        |    |      |      |       |      |       |       |
|--------|--------|----|------|------|-------|------|-------|-------|
| 56.681 | 1.6226 | 21 | 123  | 1.2  | 1026  | 1.2  | 0.142 | 898   |
| 57.058 | 1.6128 | 20 | 508  | 5.1  | 5329  | 6.2  | 0.178 | 612   |
| 57.22  | 1.6086 | 19 | 367  | 3.7  | 5924  | 6.9  | 0.274 | 354   |
| 57.938 | 1.5904 | 17 | 124  | 1.2  | 691   | 0.8  | 0.095 | >1000 |
| 58.478 | 1.577  | 15 | 274  | 2.8  | 1916  | 2.2  | 0.119 | >1000 |
| 58.803 | 1.569  | 18 | 171  | 1.7  | 3164  | 3.7  | 0.315 | 306   |
| 59.098 | 1.5619 | 18 | 1186 | 11.9 | 11096 | 13   | 0.159 | 738   |
| 59.762 | 1.5461 | 29 | 1549 | 15.6 | 10735 | 12.6 | 0.118 | >1000 |
| 60.122 | 1.5377 | 29 | 316  | 3.2  | 3742  | 4.4  | 0.201 | 525   |
| 60.739 | 1.5236 | 40 | 100  | 1    | 444   | 0.5  | 0.075 | >1000 |
| 61.082 | 1.5158 | 28 | 311  | 3.1  | 2960  | 3.5  | 0.162 | 725   |
| 61.323 | 1.5105 | 28 | 797  | 8    | 7718  | 9    | 0.165 | 706   |
| 61.877 | 1.4983 | 17 | 233  | 2.3  | 2434  | 2.8  | 0.178 | 631   |
| 62.261 | 1.4899 | 17 | 741  | 7.4  | 5574  | 6.5  | 0.128 | >1000 |
| 63.219 | 1.4697 | 16 | 636  | 6.4  | 4123  | 4.8  | 0.11  | >1000 |
| 63.622 | 1.4613 | 19 | 74   | 0.7  | 976   | 1.1  | 0.224 | 466   |
| 63.962 | 1.4544 | 7  | 430  | 4.3  | 6538  | 7.7  | 0.258 | 393   |
| 64.421 | 1.4451 | 8  | 327  | 3.3  | 2927  | 3.4  | 0.152 | 819   |
| 65.383 | 1.4261 | 13 | 59   | 0.6  | 304   | 0.4  | 0.088 | >1000 |
| 65.624 | 1.4215 | 16 | 78   | 0.8  | 487   | 0.6  | 0.106 | >1000 |
| 66.24  | 1.4098 | 16 | 752  | 7.6  | 5609  | 6.6  | 0.127 | >1000 |
| 67.162 | 1.3926 | 19 | 776  | 7.8  | 5395  | 6.3  | 0.118 | >1000 |
| 67.777 | 1.3815 | 22 | 355  | 3.6  | 4830  | 5.7  | 0.231 | 459   |
| 68.02  | 1.3771 | 12 | 222  | 2.2  | 2098  | 2.5  | 0.161 | 762   |
| 68.301 | 1.3722 | 12 | 309  | 3.1  | 2894  | 3.4  | 0.159 | 775   |
| 68.736 | 1.3645 | 8  | 58   | 0.6  | 476   | 0.6  | 0.14  | 989   |
| 69.321 | 1.3544 | 10 | 122  | 1.2  | 1192  | 1.4  | 0.166 | 728   |

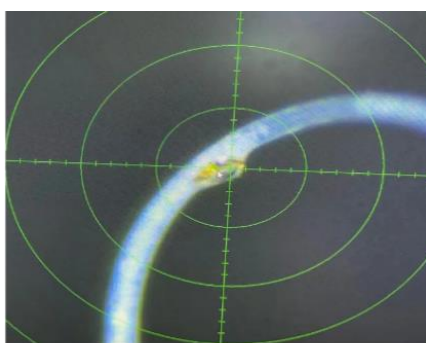

**Figure S3.** Crystal for the birefringence determination
